# Supplementary material for: Superhost Plants Alter the Structure of Plant–Galling Insect Networks in Neotropical Savannas
Source: Plants (Basel). 2019 Sep 24;8(10):369. doi: 10.3390/plants8100369 (PMC6843997; doi:10.3390/plants8100369)
Supplement: Supplementary file 1 [file plants-08-00369-s001.csv]

Plant_species	Galling_morphotypes	Site	Municipality	UF	Latitude	Longitude	Coordinates	Altitude	Biome	Vegetation				Metadata	Column's name	Details
Acosmium_dasycarpum	Acosmium_dasycarpum	Apa_Cafuringa	Brasília	Distrito_Federal	15	47	15º31’S,_47º57’W	873	Cerrado	Neotropical_savanna				A	Plant_species	Host plant species of galling insects
Aspidosperma_tomentosa	Aspidosperma_tomentosa	Apa_Cafuringa	Brasília	Distrito_Federal	15	47	15º31’S,_47º57’W	873	Cerrado	Neotropical_savanna				B	Galling_morphotypes	Morphospecies of galling insects
Byrsonima_pachyphylla	Byrsonima_pachyphylla_coni	Apa_Cafuringa	Brasília	Distrito_Federal	15	47	15º31’S,_47º57’W	873	Cerrado	Neotropical_savanna				C	Site	Sampled locality
Davilla_eliptica	Davilla_eliptica_disc	Apa_Cafuringa	Brasília	Distrito_Federal	15	47	15º31’S,_47º57’W	873	Cerrado	Neotropical_savanna				D	Municipality	Municipality
Guapira_graciliflora	Guapira_graciliflora	Apa_Cafuringa	Brasília	Distrito_Federal	15	47	15º31’S,_47º57’W	873	Cerrado	Neotropical_savanna				E	UF	Unity of Federation / State
Heteropterys_byrsonimifolia	Heteropterys_byrsonimifolia_folha	Apa_Cafuringa	Brasília	Distrito_Federal	15	47	15º31’S,_47º57’W	873	Cerrado	Neotropical_savanna				F	Latitude	Latitude
Ouratea_hexasperma	Ouratea_hexasperma	Apa_Cafuringa	Brasília	Distrito_Federal	15	47	15º31’S,_47º57’W	873	Cerrado	Neotropical_savanna				G	Longitude	Longitude
Palicourea_rigida	Palicourea_rigida_glob	Apa_Cafuringa	Brasília	Distrito_Federal	15	47	15º31’S,_47º57’W	873	Cerrado	Neotropical_savanna				H	Coordinates	Coordinates of sampled areas
Piptocarpa_rotundifolia	Piptocarpa_rotundifolia	Apa_Cafuringa	Brasília	Distrito_Federal	15	47	15º31’S,_47º57’W	873	Cerrado	Neotropical_savanna				I	Altitude	Altitude
Psidium_myrsinoides	Psidium_myrsinoides_caule	Apa_Cafuringa	Brasília	Distrito_Federal	15	47	15º31’S,_47º57’W	873	Cerrado	Neotropical_savanna				J	Biome	Biome classification
Aspidosperma_tomentosa	Aspidosperma_tomentosa	Banana_Menina	Hidrolândia	Goiás	16	49	16º59’S,_49º14’W	893	Cerrado	Neotropical_savanna				K	Vegetation	Vegetation type
Byrsonima_pachyphylla	Byrsonima_pachyphylla_coni	Banana_Menina	Hidrolândia	Goiás	16	49	16º59’S,_49º14’W	893	Cerrado	Neotropical_savanna
Byrsonima_pachyphylla	Byrsonima_pachyphylla_virg	Banana_Menina	Hidrolândia	Goiás	16	49	16º59’S,_49º14’W	893	Cerrado	Neotropical_savanna
Connarus_suberosus	Connarus_suberosus_folha	Banana_Menina	Hidrolândia	Goiás	16	49	16º59’S,_49º14’W	893	Cerrado	Neotropical_savanna
Erythroxylum_tortuosum	Erythroxylum_tortuosum	Banana_Menina	Hidrolândia	Goiás	16	49	16º59’S,_49º14’W	893	Cerrado	Neotropical_savanna
Hymenaea_stigonocarpa	Hymenaea_stigonocarpa	Banana_Menina	Hidrolândia	Goiás	16	49	16º59’S,_49º14’W	893	Cerrado	Neotropical_savanna
Neea_theifera	Neea_theifera	Banana_Menina	Hidrolândia	Goiás	16	49	16º59’S,_49º14’W	893	Cerrado	Neotropical_savanna
Plant_species	Galling_morphotype	Banana_Menina	Hidrolândia	Goiás	16	49	16º59’S,_49º14’W	893	Cerrado	Neotropical_savanna
Psidium_myrsinoides	Psidium_myrsinoides_caule	Banana_Menina	Hidrolândia	Goiás	16	49	16º59’S,_49º14’W	893	Cerrado	Neotropical_savanna
Qualea_grandiflora	Qualea_grandiflora_folha_disc	Banana_Menina	Hidrolândia	Goiás	16	49	16º59’S,_49º14’W	893	Cerrado	Neotropical_savanna
Qualea_multiflora	Qualea_multiflora_estrelada	Banana_Menina	Hidrolândia	Goiás	16	49	16º59’S,_49º14’W	893	Cerrado	Neotropical_savanna
Aspidosperma_tomentosa	Aspidosperma_tomentosa	Bela_Vista	Bela_Vista	Goiás	15	48	15º57’S,_48º56’W	809	Cerrado	Neotropical_savanna
Byrsonima_pachyphylla	Byrsonima_pachyphylla_coni	Bela_Vista	Bela_Vista	Goiás	15	48	15º57’S,_48º56’W	809	Cerrado	Neotropical_savanna
Caryocar_brasiliense	Caryocar_brasiliense_glob_pil	Bela_Vista	Bela_Vista	Goiás	15	48	15º57’S,_48º56’W	809	Cerrado	Neotropical_savanna
Connarus_suberosus	Connarus_suberosus_folha	Bela_Vista	Bela_Vista	Goiás	15	48	15º57’S,_48º56’W	809	Cerrado	Neotropical_savanna
Davilla_eliptica	Davilla_eliptica_disc	Bela_Vista	Bela_Vista	Goiás	15	48	15º57’S,_48º56’W	809	Cerrado	Neotropical_savanna
Erythroxylum_tortuosum	Erythroxylum_tortuosum	Bela_Vista	Bela_Vista	Goiás	15	48	15º57’S,_48º56’W	809	Cerrado	Neotropical_savanna
Plant_species	Galling_morphotype	Bela_Vista	Bela_Vista	Goiás	15	48	15º57’S,_48º56’W	809	Cerrado	Neotropical_savanna
Qualea_grandiflora	Qualea_grandiflora_folha_amorfa	Bela_Vista	Bela_Vista	Goiás	15	48	15º57’S,_48º56’W	809	Cerrado	Neotropical_savanna
Qualea_grandiflora	Qualea_grandiflora_folha_disc	Bela_Vista	Bela_Vista	Goiás	15	48	15º57’S,_48º56’W	809	Cerrado	Neotropical_savanna
Qualea_multiflora	Qualea_multiflora_caule	Bela_Vista	Bela_Vista	Goiás	15	48	15º57’S,_48º56’W	809	Cerrado	Neotropical_savanna
Qualea_multiflora	Qualea_multiflora_estrelada	Bela_Vista	Bela_Vista	Goiás	15	48	15º57’S,_48º56’W	809	Cerrado	Neotropical_savanna
Qualea_multiflora	Qualea_multiflora_folha_glob_gla	Bela_Vista	Bela_Vista	Goiás	15	48	15º57’S,_48º56’W	809	Cerrado	Neotropical_savanna
Qualea_parviflora	Qualea_parviflora_estrelada	Bela_Vista	Bela_Vista	Goiás	15	48	15º57’S,_48º56’W	809	Cerrado	Neotropical_savanna
Qualea_parviflora	Qualea_parviflora_glob_pilos	Bela_Vista	Bela_Vista	Goiás	15	48	15º57’S,_48º56’W	809	Cerrado	Neotropical_savanna
Terminalia_argentea	Terminalia_argentea_glob	Bela_Vista	Bela_Vista	Goiás	15	48	15º57’S,_48º56’W	809	Cerrado	Neotropical_savanna
Alibertia_edullis	Alibertia_edullis	Bom_Sucesso	Senador_Canedo	Goiás	16	49	16º42’S,_49º20’W	749	Cerrado	Neotropical_savanna
Byrsonima_pachyphylla	Byrsonima_pachyphylla_coni	Bom_Sucesso	Senador_Canedo	Goiás	16	49	16º42’S,_49º20’W	749	Cerrado	Neotropical_savanna
Byrsonima_pachyphylla	Byrsonima_pachyphylla_elips	Bom_Sucesso	Senador_Canedo	Goiás	16	49	16º42’S,_49º20’W	749	Cerrado	Neotropical_savanna
Dalbergia_miscolobium	Dalbergia_miscolobium	Bom_Sucesso	Senador_Canedo	Goiás	16	49	16º42’S,_49º20’W	749	Cerrado	Neotropical_savanna
Diospyros_hispida	Diospyros_hispida_folha	Bom_Sucesso	Senador_Canedo	Goiás	16	49	16º42’S,_49º20’W	749	Cerrado	Neotropical_savanna
Heteropterys_byrsonimifolia	Heteropterys_byrsonimifolia_folha	Bom_Sucesso	Senador_Canedo	Goiás	16	49	16º42’S,_49º20’W	749	Cerrado	Neotropical_savanna
Hymenaea_stigonocarpa	Hymenaea_stigonocarpa	Bom_Sucesso	Senador_Canedo	Goiás	16	49	16º42’S,_49º20’W	749	Cerrado	Neotropical_savanna
Matayba_guianensis	Matayba_guianensis	Bom_Sucesso	Senador_Canedo	Goiás	16	49	16º42’S,_49º20’W	749	Cerrado	Neotropical_savanna
Piptocarpa_rotundifolia	Piptocarpa_rotundifolia	Bom_Sucesso	Senador_Canedo	Goiás	16	49	16º42’S,_49º20’W	749	Cerrado	Neotropical_savanna
Plant_species	Galling_morphotype	Bom_Sucesso	Senador_Canedo	Goiás	16	49	16º42’S,_49º20’W	749	Cerrado	Neotropical_savanna
Plenckia_populnea	Plenckia_populnea	Bom_Sucesso	Senador_Canedo	Goiás	16	49	16º42’S,_49º20’W	749	Cerrado	Neotropical_savanna
Pouteria_ramiflora	Pouteria_ramiflora	Bom_Sucesso	Senador_Canedo	Goiás	16	49	16º42’S,_49º20’W	749	Cerrado	Neotropical_savanna
Qualea_grandiflora	Qualea_grandiflora_folha_disc	Bom_Sucesso	Senador_Canedo	Goiás	16	49	16º42’S,_49º20’W	749	Cerrado	Neotropical_savanna
Qualea_multiflora	Qualea_multiflora_estrelada	Bom_Sucesso	Senador_Canedo	Goiás	16	49	16º42’S,_49º20’W	749	Cerrado	Neotropical_savanna
Qualea_multiflora	Qualea_multiflora_folha_laminar	Bom_Sucesso	Senador_Canedo	Goiás	16	49	16º42’S,_49º20’W	749	Cerrado	Neotropical_savanna
Qualea_parviflora	Qualea_parviflora_estrelada	Bom_Sucesso	Senador_Canedo	Goiás	16	49	16º42’S,_49º20’W	749	Cerrado	Neotropical_savanna
Roupala_montana	Roupala_montana_disc	Bom_Sucesso	Senador_Canedo	Goiás	16	49	16º42’S,_49º20’W	749	Cerrado	Neotropical_savanna
Aspidosperma_macrocarpa	Aspidosperma_macrocarpa	Caça_&_Pesca	Uberlândia	Minas_Gerais	19	48	19º00’S,_48º18’W	864	Cerrado	Neotropical_savanna
Aspidosperma_tomentosa	Aspidosperma_tomentosa	Caça_&_Pesca	Uberlândia	Minas_Gerais	19	48	19º00’S,_48º18’W	864	Cerrado	Neotropical_savanna
Byrsonima_pachyphylla	Byrsonima_pachyphylla_cauleglob	Caça_&_Pesca	Uberlândia	Minas_Gerais	19	48	19º00’S,_48º18’W	864	Cerrado	Neotropical_savanna
Byrsonima_pachyphylla	Byrsonima_pachyphylla_disc	Caça_&_Pesca	Uberlândia	Minas_Gerais	19	48	19º00’S,_48º18’W	864	Cerrado	Neotropical_savanna
Caryocar_brasiliense	Caryocar_brasiliense_disc_pilo	Caça_&_Pesca	Uberlândia	Minas_Gerais	19	48	19º00’S,_48º18’W	864	Cerrado	Neotropical_savanna
Copaifera_langsdorfii	Copaifera_langsdorfii_caule_elip	Caça_&_Pesca	Uberlândia	Minas_Gerais	19	48	19º00’S,_48º18’W	864	Cerrado	Neotropical_savanna
Copaifera_langsdorfii	Copaifera_langsdorfii_disc_ama	Caça_&_Pesca	Uberlândia	Minas_Gerais	19	48	19º00’S,_48º18’W	864	Cerrado	Neotropical_savanna
Copaifera_langsdorfii	Copaifera_langsdorfii_glob_gla	Caça_&_Pesca	Uberlândia	Minas_Gerais	19	48	19º00’S,_48º18’W	864	Cerrado	Neotropical_savanna
Copaifera_langsdorfii	Copaifera_langsdorfii_glob_pil	Caça_&_Pesca	Uberlândia	Minas_Gerais	19	48	19º00’S,_48º18’W	864	Cerrado	Neotropical_savanna
Coupeia_grandiflora	Coupeia_grandiflora	Caça_&_Pesca	Uberlândia	Minas_Gerais	19	48	19º00’S,_48º18’W	864	Cerrado	Neotropical_savanna
Guapira_graciliflora	Guapira_graciliflora	Caça_&_Pesca	Uberlândia	Minas_Gerais	19	48	19º00’S,_48º18’W	864	Cerrado	Neotropical_savanna
Hymenaea_stigonocarpa	Hymenaea_stigonocarpa	Caça_&_Pesca	Uberlândia	Minas_Gerais	19	48	19º00’S,_48º18’W	864	Cerrado	Neotropical_savanna
Kielmeyera_rubiflora	Kielmeyera_rubiflora	Caça_&_Pesca	Uberlândia	Minas_Gerais	19	48	19º00’S,_48º18’W	864	Cerrado	Neotropical_savanna
Myrtaceae_sp.	Myrtaceae_sp._4	Caça_&_Pesca	Uberlândia	Minas_Gerais	19	48	19º00’S,_48º18’W	864	Cerrado	Neotropical_savanna
Ouratea_hexasperma	Ouratea_hexasperma	Caça_&_Pesca	Uberlândia	Minas_Gerais	19	48	19º00’S,_48º18’W	864	Cerrado	Neotropical_savanna
Ouratea_spectabilis	Ouratea_spectabilis_coni	Caça_&_Pesca	Uberlândia	Minas_Gerais	19	48	19º00’S,_48º18’W	864	Cerrado	Neotropical_savanna
Ouratea_spectabilis	Ouratea_spectabilis_dis	Caça_&_Pesca	Uberlândia	Minas_Gerais	19	48	19º00’S,_48º18’W	864	Cerrado	Neotropical_savanna
Plant_species	Galling_morphotype	Caça_&_Pesca	Uberlândia	Minas_Gerais	19	48	19º00’S,_48º18’W	864	Cerrado	Neotropical_savanna
Pouteria_ramiflora	Pouteria_ramiflora	Caça_&_Pesca	Uberlândia	Minas_Gerais	19	48	19º00’S,_48º18’W	864	Cerrado	Neotropical_savanna
Pouteria_torta	Pouteria_torta_disc	Caça_&_Pesca	Uberlândia	Minas_Gerais	19	48	19º00’S,_48º18’W	864	Cerrado	Neotropical_savanna
Qualea_grandiflora	Qualea_grandiflora_folha_disc	Caça_&_Pesca	Uberlândia	Minas_Gerais	19	48	19º00’S,_48º18’W	864	Cerrado	Neotropical_savanna
Qualea_multiflora	Qualea_multiflora_caule	Caça_&_Pesca	Uberlândia	Minas_Gerais	19	48	19º00’S,_48º18’W	864	Cerrado	Neotropical_savanna
Qualea_multiflora	Qualea_multiflora_estrelada	Caça_&_Pesca	Uberlândia	Minas_Gerais	19	48	19º00’S,_48º18’W	864	Cerrado	Neotropical_savanna
Qualea_multiflora	Qualea_multiflora_folha_glob_gla	Caça_&_Pesca	Uberlândia	Minas_Gerais	19	48	19º00’S,_48º18’W	864	Cerrado	Neotropical_savanna
Qualea_multiflora	Qualea_multiflora_folha_glob_pil	Caça_&_Pesca	Uberlândia	Minas_Gerais	19	48	19º00’S,_48º18’W	864	Cerrado	Neotropical_savanna
Qualea_parviflora	Qualea_parviflora_disc_glab	Caça_&_Pesca	Uberlândia	Minas_Gerais	19	48	19º00’S,_48º18’W	864	Cerrado	Neotropical_savanna
Qualea_parviflora	Qualea_parviflora_glob_pilos	Caça_&_Pesca	Uberlândia	Minas_Gerais	19	48	19º00’S,_48º18’W	864	Cerrado	Neotropical_savanna
Roupala_montana	Roupala_montana_coni	Caça_&_Pesca	Uberlândia	Minas_Gerais	19	48	19º00’S,_48º18’W	864	Cerrado	Neotropical_savanna
Roupala_montana	Roupala_montana_disc	Caça_&_Pesca	Uberlândia	Minas_Gerais	19	48	19º00’S,_48º18’W	864	Cerrado	Neotropical_savanna
Schefflera_macrocarpa	Schefflera_macrocarpa_glob	Caça_&_Pesca	Uberlândia	Minas_Gerais	19	48	19º00’S,_48º18’W	864	Cerrado	Neotropical_savanna
Styrax_acuminatus	Styrax_acuminatus_caule	Caça_&_Pesca	Uberlândia	Minas_Gerais	19	48	19º00’S,_48º18’W	864	Cerrado	Neotropical_savanna
Styrax_acuminatus	Styrax_acuminatus_folha	Caça_&_Pesca	Uberlândia	Minas_Gerais	19	48	19º00’S,_48º18’W	864	Cerrado	Neotropical_savanna
Tabebuia_aurea	Tabebuia_aurea_elips	Caça_&_Pesca	Uberlândia	Minas_Gerais	19	48	19º00’S,_48º18’W	864	Cerrado	Neotropical_savanna
Aspidosperma_tomentosa	Aspidosperma_tomentosa	Caldas_Novas	Caldas_Novas	Goiás	17	48	17º42’S,_48º38’W	702	Cerrado	Neotropical_savanna
Byrsonima_coccolobifolia	Byrsonima_coccolobifolia	Caldas_Novas	Caldas_Novas	Goiás	17	48	17º42’S,_48º38’W	702	Cerrado	Neotropical_savanna
Byrsonima_pachyphylla	Byrsonima_pachyphylla_coni	Caldas_Novas	Caldas_Novas	Goiás	17	48	17º42’S,_48º38’W	702	Cerrado	Neotropical_savanna
Caryocar_brasiliense	Caryocar_brasiliense_disc_glab	Caldas_Novas	Caldas_Novas	Goiás	17	48	17º42’S,_48º38’W	702	Cerrado	Neotropical_savanna
Copaifera_langsdorfii	Copaifera_langsdorfii_f_boca	Caldas_Novas	Caldas_Novas	Goiás	17	48	17º42’S,_48º38’W	702	Cerrado	Neotropical_savanna
Davilla_eliptica	Davilla_eliptica_disc	Caldas_Novas	Caldas_Novas	Goiás	17	48	17º42’S,_48º38’W	702	Cerrado	Neotropical_savanna
Diospyros_hispida	Diospyros_hispida_caule	Caldas_Novas	Caldas_Novas	Goiás	17	48	17º42’S,_48º38’W	702	Cerrado	Neotropical_savanna
Erythroxylum_suberosum	Erythroxylum_suberosum_amorfa	Caldas_Novas	Caldas_Novas	Goiás	17	48	17º42’S,_48º38’W	702	Cerrado	Neotropical_savanna
Erythroxylum_suberosum	Erythroxylum_suberosum_enrolamento	Caldas_Novas	Caldas_Novas	Goiás	17	48	17º42’S,_48º38’W	702	Cerrado	Neotropical_savanna
Ouratea_hexasperma	Ouratea_hexasperma	Caldas_Novas	Caldas_Novas	Goiás	17	48	17º42’S,_48º38’W	702	Cerrado	Neotropical_savanna
Plant_species	Galling_morphotype	Caldas_Novas	Caldas_Novas	Goiás	17	48	17º42’S,_48º38’W	702	Cerrado	Neotropical_savanna
Qualea_grandiflora	Qualea_grandiflora_folha_disc	Caldas_Novas	Caldas_Novas	Goiás	17	48	17º42’S,_48º38’W	702	Cerrado	Neotropical_savanna
Qualea_multiflora	Qualea_multiflora_estrelada	Caldas_Novas	Caldas_Novas	Goiás	17	48	17º42’S,_48º38’W	702	Cerrado	Neotropical_savanna
Roupala_montana	Roupala_montana_coni	Caldas_Novas	Caldas_Novas	Goiás	17	48	17º42’S,_48º38’W	702	Cerrado	Neotropical_savanna
Styrax_ferrugineus	Styrax_ferrugineus_caule	Caldas_Novas	Caldas_Novas	Goiás	17	48	17º42’S,_48º38’W	702	Cerrado	Neotropical_savanna
Terminalia_argentea	Terminalia_argentea_glob	Caldas_Novas	Caldas_Novas	Goiás	17	48	17º42’S,_48º38’W	702	Cerrado	Neotropical_savanna
Aspidosperma_macrocarpa	Aspidosperma_macrocarpa	Fazenda_Geraldo	Silvânia	Goiás	16	48	16º40’S,_48º18’W	837	Cerrado	Neotropical_savanna
Aspidosperma_tomentosa	Aspidosperma_tomentosa	Fazenda_Geraldo	Silvânia	Goiás	16	48	16º40’S,_48º18’W	837	Cerrado	Neotropical_savanna
Byrsonima_pachyphylla	Byrsonima_pachyphylla_cauleglob	Fazenda_Geraldo	Silvânia	Goiás	16	48	16º40’S,_48º18’W	837	Cerrado	Neotropical_savanna
Byrsonima_pachyphylla	Byrsonima_pachyphylla_coni	Fazenda_Geraldo	Silvânia	Goiás	16	48	16º40’S,_48º18’W	837	Cerrado	Neotropical_savanna
Byrsonima_verbascifolia	Byrsonima_verbascifolia_coni	Fazenda_Geraldo	Silvânia	Goiás	16	48	16º40’S,_48º18’W	837	Cerrado	Neotropical_savanna
Caryocar_brasiliense	Caryocar_brasiliense_glob_glab	Fazenda_Geraldo	Silvânia	Goiás	16	48	16º40’S,_48º18’W	837	Cerrado	Neotropical_savanna
Caryocar_brasiliense	Caryocar_brasiliense_glob_pil	Fazenda_Geraldo	Silvânia	Goiás	16	48	16º40’S,_48º18’W	837	Cerrado	Neotropical_savanna
Davilla_eliptica	Davilla_eliptica_disc	Fazenda_Geraldo	Silvânia	Goiás	16	48	16º40’S,_48º18’W	837	Cerrado	Neotropical_savanna
Eriotheca_pubescens	Eriotheca_pubescens	Fazenda_Geraldo	Silvânia	Goiás	16	48	16º40’S,_48º18’W	837	Cerrado	Neotropical_savanna
Heteropterys_byrsonimifolia	Heteropterys_byrsonimifolia_folha	Fazenda_Geraldo	Silvânia	Goiás	16	48	16º40’S,_48º18’W	837	Cerrado	Neotropical_savanna
Miconia_albicans	Miconia_albicans	Fazenda_Geraldo	Silvânia	Goiás	16	48	16º40’S,_48º18’W	837	Cerrado	Neotropical_savanna
Neea_theifera	Neea_theifera	Fazenda_Geraldo	Silvânia	Goiás	16	48	16º40’S,_48º18’W	837	Cerrado	Neotropical_savanna
Ouratea_hexasperma	Ouratea_hexasperma	Fazenda_Geraldo	Silvânia	Goiás	16	48	16º40’S,_48º18’W	837	Cerrado	Neotropical_savanna
Ouratea_hexasperma	Ouratea_hexasperma_caule	Fazenda_Geraldo	Silvânia	Goiás	16	48	16º40’S,_48º18’W	837	Cerrado	Neotropical_savanna
Piptocarpa_rotundifolia	Piptocarpa_rotundifolia	Fazenda_Geraldo	Silvânia	Goiás	16	48	16º40’S,_48º18’W	837	Cerrado	Neotropical_savanna
Plant_species	Galling_morphotype	Fazenda_Geraldo	Silvânia	Goiás	16	48	16º40’S,_48º18’W	837	Cerrado	Neotropical_savanna
Qualea_grandiflora	Qualea_grandiflora_folha_disc	Fazenda_Geraldo	Silvânia	Goiás	16	48	16º40’S,_48º18’W	837	Cerrado	Neotropical_savanna
Stryphnodendron_adstringens	Stryphnodendron_adstringens	Fazenda_Geraldo	Silvânia	Goiás	16	48	16º40’S,_48º18’W	837	Cerrado	Neotropical_savanna
Styrax_ferrugineus	Styrax_ferrugineus_caule	Fazenda_Geraldo	Silvânia	Goiás	16	48	16º40’S,_48º18’W	837	Cerrado	Neotropical_savanna
Styrax_ferrugineus	Styrax_ferrugineus_folha	Fazenda_Geraldo	Silvânia	Goiás	16	48	16º40’S,_48º18’W	837	Cerrado	Neotropical_savanna
Xylopia_aromatica	Xylopia_aromatica	Fazenda_Geraldo	Silvânia	Goiás	16	48	16º40’S,_48º18’W	837	Cerrado	Neotropical_savanna
Caryocar_brasiliense	Caryocar_brasiliense_disc_glab	Fazenda_Lageado	Jataí	Goiás	17	51	17º53’S,_51º38’W	756	Cerrado	Neotropical_savanna
Caryocar_brasiliense	Caryocar_brasiliense_glob_pil	Fazenda_Lageado	Jataí	Goiás	17	51	17º53’S,_51º38’W	756	Cerrado	Neotropical_savanna
Caryocar_brasiliense	Caryocar_brasiliense_peciolo	Fazenda_Lageado	Jataí	Goiás	17	51	17º53’S,_51º38’W	756	Cerrado	Neotropical_savanna
Davilla_eliptica	Davilla_eliptica_abacaxi	Fazenda_Lageado	Jataí	Goiás	17	51	17º53’S,_51º38’W	756	Cerrado	Neotropical_savanna
Davilla_eliptica	Davilla_eliptica_disc	Fazenda_Lageado	Jataí	Goiás	17	51	17º53’S,_51º38’W	756	Cerrado	Neotropical_savanna
Dimorphandra_mollis	Dimorphandra_mollis	Fazenda_Lageado	Jataí	Goiás	17	51	17º53’S,_51º38’W	756	Cerrado	Neotropical_savanna
Diospyros_burchelli	Diospyros_burchelli_pil	Fazenda_Lageado	Jataí	Goiás	17	51	17º53’S,_51º38’W	756	Cerrado	Neotropical_savanna
Eriotheca_pubescens	Eriotheca_pubescens	Fazenda_Lageado	Jataí	Goiás	17	51	17º53’S,_51º38’W	756	Cerrado	Neotropical_savanna
Erythroxylum_deciduum	Erythroxylum_deciduum_folha	Fazenda_Lageado	Jataí	Goiás	17	51	17º53’S,_51º38’W	756	Cerrado	Neotropical_savanna
Erythroxylum_deciduum	Erythroxylum_deciduum_gema	Fazenda_Lageado	Jataí	Goiás	17	51	17º53’S,_51º38’W	756	Cerrado	Neotropical_savanna
Licania_humilis	Licania_humilis_enrolamento	Fazenda_Lageado	Jataí	Goiás	17	51	17º53’S,_51º38’W	756	Cerrado	Neotropical_savanna
Matayba_guianensis	Matayba_guianensis	Fazenda_Lageado	Jataí	Goiás	17	51	17º53’S,_51º38’W	756	Cerrado	Neotropical_savanna
Ouratea_spectabilis	Ouratea_spectabilis_dis	Fazenda_Lageado	Jataí	Goiás	17	51	17º53’S,_51º38’W	756	Cerrado	Neotropical_savanna
Piptocarpa_rotundifolia	Piptocarpa_rotundifolia	Fazenda_Lageado	Jataí	Goiás	17	51	17º53’S,_51º38’W	756	Cerrado	Neotropical_savanna
Plant_species	Galling_morphotype	Fazenda_Lageado	Jataí	Goiás	17	51	17º53’S,_51º38’W	756	Cerrado	Neotropical_savanna
Qualea_grandiflora	Qualea_grandiflora_caule	Fazenda_Lageado	Jataí	Goiás	17	51	17º53’S,_51º38’W	756	Cerrado	Neotropical_savanna
Qualea_grandiflora	Qualea_grandiflora_folha_disc	Fazenda_Lageado	Jataí	Goiás	17	51	17º53’S,_51º38’W	756	Cerrado	Neotropical_savanna
Qualea_multiflora	Qualea_multiflora_estrelada	Fazenda_Lageado	Jataí	Goiás	17	51	17º53’S,_51º38’W	756	Cerrado	Neotropical_savanna
Qualea_multiflora	Qualea_multiflora_folha_glob_gla	Fazenda_Lageado	Jataí	Goiás	17	51	17º53’S,_51º38’W	756	Cerrado	Neotropical_savanna
Qualea_multiflora	Qualea_multiflora_folha_glob_pil	Fazenda_Lageado	Jataí	Goiás	17	51	17º53’S,_51º38’W	756	Cerrado	Neotropical_savanna
Roupala_montana	Roupala_montana_coni	Fazenda_Lageado	Jataí	Goiás	17	51	17º53’S,_51º38’W	756	Cerrado	Neotropical_savanna
Roupala_montana	Roupala_montana_disc	Fazenda_Lageado	Jataí	Goiás	17	51	17º53’S,_51º38’W	756	Cerrado	Neotropical_savanna
Sclerolobium_paniculatum	Sclerolobium_paniculatum	Fazenda_Lageado	Jataí	Goiás	17	51	17º53’S,_51º38’W	756	Cerrado	Neotropical_savanna
Strychnos_pseudoquina	Strychnos_pseudoquina	Fazenda_Lageado	Jataí	Goiás	17	51	17º53’S,_51º38’W	756	Cerrado	Neotropical_savanna
Tabebuia_aurea	Tabebuia_aurea_elips	Fazenda_Lageado	Jataí	Goiás	17	51	17º53’S,_51º38’W	756	Cerrado	Neotropical_savanna
Tabebuia_aurea	Tabebuia_aurea_glob	Fazenda_Lageado	Jataí	Goiás	17	51	17º53’S,_51º38’W	756	Cerrado	Neotropical_savanna
Terminalia_argentea	Terminalia_argentea_disc	Fazenda_Lageado	Jataí	Goiás	17	51	17º53’S,_51º38’W	756	Cerrado	Neotropical_savanna
Terminalia_argentea	Terminalia_argentea_glob	Fazenda_Lageado	Jataí	Goiás	17	51	17º53’S,_51º38’W	756	Cerrado	Neotropical_savanna
Vernonia_polysphaera	Vernonia_polysphaera_caule	Fazenda_Lageado	Jataí	Goiás	17	51	17º53’S,_51º38’W	756	Cerrado	Neotropical_savanna
Vernonia_polysphaera	Vernonia_polysphaera_folha	Fazenda_Lageado	Jataí	Goiás	17	51	17º53’S,_51º38’W	756	Cerrado	Neotropical_savanna
Xylopia_aromatica	Xylopia_aromatica	Fazenda_Lageado	Jataí	Goiás	17	51	17º53’S,_51º38’W	756	Cerrado	Neotropical_savanna
Acosmium_dasycarpum	Acosmium_dasycarpum	Floresta_do_Lobo	Uberlândia	Minas_Gerais	19	48	19º50’S,_48º90’W	948	Cerrado	Neotropical_savanna
Aspidosperma_tomentosa	Aspidosperma_tomentosa	Floresta_do_Lobo	Uberlândia	Minas_Gerais	19	48	19º50’S,_48º90’W	948	Cerrado	Neotropical_savanna
Byrsonima_coccolobifolia	Byrsonima_coccolobifolia	Floresta_do_Lobo	Uberlândia	Minas_Gerais	19	48	19º50’S,_48º90’W	948	Cerrado	Neotropical_savanna
Byrsonima_verbascifolia	Byrsonima_verbascifolia_coni	Floresta_do_Lobo	Uberlândia	Minas_Gerais	19	48	19º50’S,_48º90’W	948	Cerrado	Neotropical_savanna
Byrsonima_verbascifolia	Byrsonima_verbascifolia_disc	Floresta_do_Lobo	Uberlândia	Minas_Gerais	19	48	19º50’S,_48º90’W	948	Cerrado	Neotropical_savanna
Caryocar_brasiliense	Caryocar_brasiliense_glob_pil	Floresta_do_Lobo	Uberlândia	Minas_Gerais	19	48	19º50’S,_48º90’W	948	Cerrado	Neotropical_savanna
Connarus_suberosus	Connarus_suberosus_caule	Floresta_do_Lobo	Uberlândia	Minas_Gerais	19	48	19º50’S,_48º90’W	948	Cerrado	Neotropical_savanna
Diospyros_burchelli	Diospyros_burchelli_gla	Floresta_do_Lobo	Uberlândia	Minas_Gerais	19	48	19º50’S,_48º90’W	948	Cerrado	Neotropical_savanna
Eriotheca_gracilipes	Eriotheca_gracilipes	Floresta_do_Lobo	Uberlândia	Minas_Gerais	19	48	19º50’S,_48º90’W	948	Cerrado	Neotropical_savanna
Erythroxylum_suberosum	Erythroxylum_suberosum_amorfa	Floresta_do_Lobo	Uberlândia	Minas_Gerais	19	48	19º50’S,_48º90’W	948	Cerrado	Neotropical_savanna
Erythroxylum_tortuosum	Erythroxylum_tortuosum	Floresta_do_Lobo	Uberlândia	Minas_Gerais	19	48	19º50’S,_48º90’W	948	Cerrado	Neotropical_savanna
Hymenaea_stigonocarpa	Hymenaea_stigonocarpa	Floresta_do_Lobo	Uberlândia	Minas_Gerais	19	48	19º50’S,_48º90’W	948	Cerrado	Neotropical_savanna
Licania_humilis	Licania_humilis_glob	Floresta_do_Lobo	Uberlândia	Minas_Gerais	19	48	19º50’S,_48º90’W	948	Cerrado	Neotropical_savanna
Machaerium_opacum	Machaerium_opacum	Floresta_do_Lobo	Uberlândia	Minas_Gerais	19	48	19º50’S,_48º90’W	948	Cerrado	Neotropical_savanna
Miconia_albicans	Miconia_albicans	Floresta_do_Lobo	Uberlândia	Minas_Gerais	19	48	19º50’S,_48º90’W	948	Cerrado	Neotropical_savanna
Ouratea_hexasperma	Ouratea_hexasperma	Floresta_do_Lobo	Uberlândia	Minas_Gerais	19	48	19º50’S,_48º90’W	948	Cerrado	Neotropical_savanna
Ouratea_spectabilis	Ouratea_spectabilis_dis	Floresta_do_Lobo	Uberlândia	Minas_Gerais	19	48	19º50’S,_48º90’W	948	Cerrado	Neotropical_savanna
Piptocarpa_rotundifolia	Piptocarpa_rotundifolia	Floresta_do_Lobo	Uberlândia	Minas_Gerais	19	48	19º50’S,_48º90’W	948	Cerrado	Neotropical_savanna
Plant_species	Galling_morphotype	Floresta_do_Lobo	Uberlândia	Minas_Gerais	19	48	19º50’S,_48º90’W	948	Cerrado	Neotropical_savanna
Pouteria_ramiflora	Pouteria_ramiflora	Floresta_do_Lobo	Uberlândia	Minas_Gerais	19	48	19º50’S,_48º90’W	948	Cerrado	Neotropical_savanna
Pouteria_torta	Pouteria_torta_coni	Floresta_do_Lobo	Uberlândia	Minas_Gerais	19	48	19º50’S,_48º90’W	948	Cerrado	Neotropical_savanna
Pouteria_torta	Pouteria_torta_disc	Floresta_do_Lobo	Uberlândia	Minas_Gerais	19	48	19º50’S,_48º90’W	948	Cerrado	Neotropical_savanna
Psidium_pohlianum	Psidium_pohlianum	Floresta_do_Lobo	Uberlândia	Minas_Gerais	19	48	19º50’S,_48º90’W	948	Cerrado	Neotropical_savanna
Qualea_grandiflora	Qualea_grandiflora_folha_disc	Floresta_do_Lobo	Uberlândia	Minas_Gerais	19	48	19º50’S,_48º90’W	948	Cerrado	Neotropical_savanna
Qualea_multiflora	Qualea_multiflora_folha_glob_pil	Floresta_do_Lobo	Uberlândia	Minas_Gerais	19	48	19º50’S,_48º90’W	948	Cerrado	Neotropical_savanna
Rapanea_guianensis	Rapanea_guianensis	Floresta_do_Lobo	Uberlândia	Minas_Gerais	19	48	19º50’S,_48º90’W	948	Cerrado	Neotropical_savanna
Andira_paniculata	Andira_paniculata	Itanhangá	Goiânia	Goiás	16	49	16º33’S,_49º17’W	762	Cerrado	Neotropical_savanna
Aspidosperma_tomentosa	Aspidosperma_tomentosa	Itanhangá	Goiânia	Goiás	16	49	16º33’S,_49º17’W	762	Cerrado	Neotropical_savanna
Byrsonima_pachyphylla	Byrsonima_pachyphylla_coni	Itanhangá	Goiânia	Goiás	16	49	16º33’S,_49º17’W	762	Cerrado	Neotropical_savanna
Diospyros_hispida	Diospyros_hispida_folha	Itanhangá	Goiânia	Goiás	16	49	16º33’S,_49º17’W	762	Cerrado	Neotropical_savanna
Erythroxylum_suberosum	Erythroxylum_suberosum_amorfa	Itanhangá	Goiânia	Goiás	16	49	16º33’S,_49º17’W	762	Cerrado	Neotropical_savanna
Erythroxylum_tortuosum	Erythroxylum_tortuosum	Itanhangá	Goiânia	Goiás	16	49	16º33’S,_49º17’W	762	Cerrado	Neotropical_savanna
Guapira_noxia	Guapira_noxia	Itanhangá	Goiânia	Goiás	16	49	16º33’S,_49º17’W	762	Cerrado	Neotropical_savanna
Ouratea_hexasperma	Ouratea_hexasperma	Itanhangá	Goiânia	Goiás	16	49	16º33’S,_49º17’W	762	Cerrado	Neotropical_savanna
Plant_species	Galling_morphotype	Itanhangá	Goiânia	Goiás	16	49	16º33’S,_49º17’W	762	Cerrado	Neotropical_savanna
Qualea_grandiflora	Qualea_grandiflora_folha_disc	Itanhangá	Goiânia	Goiás	16	49	16º33’S,_49º17’W	762	Cerrado	Neotropical_savanna
Qualea_parviflora	Qualea_parviflora_estrelada	Itanhangá	Goiânia	Goiás	16	49	16º33’S,_49º17’W	762	Cerrado	Neotropical_savanna
Qualea_parviflora	Qualea_parviflora_glob_glabra	Itanhangá	Goiânia	Goiás	16	49	16º33’S,_49º17’W	762	Cerrado	Neotropical_savanna
Roupala_montana	Roupala_montana_coni	Itanhangá	Goiânia	Goiás	16	49	16º33’S,_49º17’W	762	Cerrado	Neotropical_savanna
Styrax_ferrugineus	Styrax_ferrugineus_caule	Itanhangá	Goiânia	Goiás	16	49	16º33’S,_49º17’W	762	Cerrado	Neotropical_savanna
Aspidosperma_macrocarpa	Aspidosperma_macrocarpa	Pedreira	Pirenópolis	Goiás	15	48	15º50’S,_48º55’W	840	Cerrado	Neotropical_savanna
Aspidosperma_tomentosa	Aspidosperma_tomentosa	Pedreira	Pirenópolis	Goiás	15	48	15º50’S,_48º55’W	840	Cerrado	Neotropical_savanna
Byrsonima_pachyphylla	Byrsonima_pachyphylla_coni	Pedreira	Pirenópolis	Goiás	15	48	15º50’S,_48º55’W	840	Cerrado	Neotropical_savanna
Davilla_eliptica	Davilla_eliptica_abacaxi	Pedreira	Pirenópolis	Goiás	15	48	15º50’S,_48º55’W	840	Cerrado	Neotropical_savanna
Davilla_eliptica	Davilla_eliptica_disc	Pedreira	Pirenópolis	Goiás	15	48	15º50’S,_48º55’W	840	Cerrado	Neotropical_savanna
Heteropterys_byrsonimifolia	Heteropterys_byrsonimifolia_caule	Pedreira	Pirenópolis	Goiás	15	48	15º50’S,_48º55’W	840	Cerrado	Neotropical_savanna
Heteropterys_byrsonimifolia	Heteropterys_byrsonimifolia_folha	Pedreira	Pirenópolis	Goiás	15	48	15º50’S,_48º55’W	840	Cerrado	Neotropical_savanna
Palicourea_rigida	Palicourea_rigida_glob	Pedreira	Pirenópolis	Goiás	15	48	15º50’S,_48º55’W	840	Cerrado	Neotropical_savanna
Plant_species	Galling_morphotype	Pedreira	Pirenópolis	Goiás	15	48	15º50’S,_48º55’W	840	Cerrado	Neotropical_savanna
Pouteria_torta	Pouteria_torta_disc	Pedreira	Pirenópolis	Goiás	15	48	15º50’S,_48º55’W	840	Cerrado	Neotropical_savanna
Psidium_myrsinoides	Psidium_myrsinoides_caule	Pedreira	Pirenópolis	Goiás	15	48	15º50’S,_48º55’W	840	Cerrado	Neotropical_savanna
Psidium_myrsinoides	Psidium_myrsinoides_folha	Pedreira	Pirenópolis	Goiás	15	48	15º50’S,_48º55’W	840	Cerrado	Neotropical_savanna
Qualea_grandiflora	Qualea_grandiflora_caule	Pedreira	Pirenópolis	Goiás	15	48	15º50’S,_48º55’W	840	Cerrado	Neotropical_savanna
Qualea_grandiflora	Qualea_grandiflora_folha_disc	Pedreira	Pirenópolis	Goiás	15	48	15º50’S,_48º55’W	840	Cerrado	Neotropical_savanna
Qualea_multiflora	Qualea_multiflora_folha_disc_glab	Pedreira	Pirenópolis	Goiás	15	48	15º50’S,_48º55’W	840	Cerrado	Neotropical_savanna
Qualea_multiflora	Qualea_multiflora_folha_disc_pil	Pedreira	Pirenópolis	Goiás	15	48	15º50’S,_48º55’W	840	Cerrado	Neotropical_savanna
Qualea_parviflora	Qualea_parviflora_caule	Pedreira	Pirenópolis	Goiás	15	48	15º50’S,_48º55’W	840	Cerrado	Neotropical_savanna
Qualea_parviflora	Qualea_parviflora_caule_glob_rug	Pedreira	Pirenópolis	Goiás	15	48	15º50’S,_48º55’W	840	Cerrado	Neotropical_savanna
Qualea_parviflora	Qualea_parviflora_disc_glab	Pedreira	Pirenópolis	Goiás	15	48	15º50’S,_48º55’W	840	Cerrado	Neotropical_savanna
Qualea_parviflora	Qualea_parviflora_estrelada	Pedreira	Pirenópolis	Goiás	15	48	15º50’S,_48º55’W	840	Cerrado	Neotropical_savanna
Qualea_parviflora	Qualea_parviflora_folha_coni	Pedreira	Pirenópolis	Goiás	15	48	15º50’S,_48º55’W	840	Cerrado	Neotropical_savanna
Roupala_montana	Roupala_montana_disc	Pedreira	Pirenópolis	Goiás	15	48	15º50’S,_48º55’W	840	Cerrado	Neotropical_savanna
Acosmium_dasycarpum	Acosmium_dasycarpum	Porto_Real	Porto_Real	Tocantins	11	47	11º00’S,_47º13’W	380	Cerrado	Neotropical_savanna
Byrsonima_2	Byrsonima_2	Porto_Real	Porto_Real	Tocantins	11	47	11º00’S,_47º13’W	380	Cerrado	Neotropical_savanna
Byrsonima_pachyphylla	Byrsonima_pachyphylla_coni	Porto_Real	Porto_Real	Tocantins	11	47	11º00’S,_47º13’W	380	Cerrado	Neotropical_savanna
Caryocar_glabrum	Caryocar_glabrum	Porto_Real	Porto_Real	Tocantins	11	47	11º00’S,_47º13’W	380	Cerrado	Neotropical_savanna
Davilla_eliptica	Davilla_eliptica_disc	Porto_Real	Porto_Real	Tocantins	11	47	11º00’S,_47º13’W	380	Cerrado	Neotropical_savanna
Ouratea_hexasperma	Ouratea_hexasperma	Porto_Real	Porto_Real	Tocantins	11	47	11º00’S,_47º13’W	380	Cerrado	Neotropical_savanna
Plant_species	Galling_morphotype	Porto_Real	Porto_Real	Tocantins	11	47	11º00’S,_47º13’W	380	Cerrado	Neotropical_savanna
Pouteria_ramiflora	Pouteria_ramiflora	Porto_Real	Porto_Real	Tocantins	11	47	11º00’S,_47º13’W	380	Cerrado	Neotropical_savanna
Qualea_parviflora	Qualea_parviflora_caule	Porto_Real	Porto_Real	Tocantins	11	47	11º00’S,_47º13’W	380	Cerrado	Neotropical_savanna
Qualea_parviflora	Qualea_parviflora_disc_glab	Porto_Real	Porto_Real	Tocantins	11	47	11º00’S,_47º13’W	380	Cerrado	Neotropical_savanna
Qualea_parviflora	Qualea_parviflora_estrelada	Porto_Real	Porto_Real	Tocantins	11	47	11º00’S,_47º13’W	380	Cerrado	Neotropical_savanna
Qualea_parviflora	Qualea_parviflora_folha_coni	Porto_Real	Porto_Real	Tocantins	11	47	11º00’S,_47º13’W	380	Cerrado	Neotropical_savanna
Salvertia_convalariedora	Salvertia_convalariedora	Porto_Real	Porto_Real	Tocantins	11	47	11º00’S,_47º13’W	380	Cerrado	Neotropical_savanna
Strychnos_pseudoquina	Strychnos_pseudoquina	Porto_Real	Porto_Real	Tocantins	11	47	11º00’S,_47º13’W	380	Cerrado	Neotropical_savanna
Byrsonima_verbascifolia	Byrsonima_verbascifolia_glob	Rebio_Contagem	Brasília	Distrito_Federal	15	47	15º37’S,_47º52’W	994	Cerrado	Neotropical_savanna
Davilla_eliptica	Davilla_eliptica_disc	Rebio_Contagem	Brasília	Distrito_Federal	15	47	15º37’S,_47º52’W	994	Cerrado	Neotropical_savanna
Eriotheca_gracilipes	Eriotheca_gracilipes	Rebio_Contagem	Brasília	Distrito_Federal	15	47	15º37’S,_47º52’W	994	Cerrado	Neotropical_savanna
Kielmeyera_coriaceae	Kielmeyera_coriaceae	Rebio_Contagem	Brasília	Distrito_Federal	15	47	15º37’S,_47º52’W	994	Cerrado	Neotropical_savanna
Neea_theifera	Neea_theifera	Rebio_Contagem	Brasília	Distrito_Federal	15	47	15º37’S,_47º52’W	994	Cerrado	Neotropical_savanna
Ouratea_hexasperma	Ouratea_hexasperma	Rebio_Contagem	Brasília	Distrito_Federal	15	47	15º37’S,_47º52’W	994	Cerrado	Neotropical_savanna
Palicourea_rigida	Palicourea_rigida_glob	Rebio_Contagem	Brasília	Distrito_Federal	15	47	15º37’S,_47º52’W	994	Cerrado	Neotropical_savanna
Plant_species	Galling_morphotype	Rebio_Contagem	Brasília	Distrito_Federal	15	47	15º37’S,_47º52’W	994	Cerrado	Neotropical_savanna
Psidium_myrsinoides	Psidium_myrsinoides_caule	Rebio_Contagem	Brasília	Distrito_Federal	15	47	15º37’S,_47º52’W	994	Cerrado	Neotropical_savanna
Psidium_myrsinoides	Psidium_myrsinoides_folha	Rebio_Contagem	Brasília	Distrito_Federal	15	47	15º37’S,_47º52’W	994	Cerrado	Neotropical_savanna
Aspidosperma_tomentosa	Aspidosperma_tomentosa	Senador_Canedo	Senador_Canedo	Goiás	16	49	16º43’S,_49º60’W	774	Cerrado	Neotropical_savanna
Byrsonima_pachyphylla	Byrsonima_pachyphylla_cauleglob	Senador_Canedo	Senador_Canedo	Goiás	16	49	16º43’S,_49º60’W	774	Cerrado	Neotropical_savanna
Byrsonima_pachyphylla	Byrsonima_pachyphylla_coni	Senador_Canedo	Senador_Canedo	Goiás	16	49	16º43’S,_49º60’W	774	Cerrado	Neotropical_savanna
Caryocar_brasiliense	Caryocar_brasiliense_glob_pil	Senador_Canedo	Senador_Canedo	Goiás	16	49	16º43’S,_49º60’W	774	Cerrado	Neotropical_savanna
Ouratea_hexasperma	Ouratea_hexasperma	Senador_Canedo	Senador_Canedo	Goiás	16	49	16º43’S,_49º60’W	774	Cerrado	Neotropical_savanna
Plant_species	Galling_morphotype	Senador_Canedo	Senador_Canedo	Goiás	16	49	16º43’S,_49º60’W	774	Cerrado	Neotropical_savanna
Qualea_grandiflora	Qualea_grandiflora_caule	Senador_Canedo	Senador_Canedo	Goiás	16	49	16º43’S,_49º60’W	774	Cerrado	Neotropical_savanna
Qualea_grandiflora	Qualea_grandiflora_folha_disc	Senador_Canedo	Senador_Canedo	Goiás	16	49	16º43’S,_49º60’W	774	Cerrado	Neotropical_savanna
Roupala_montana	Roupala_montana_coni	Senador_Canedo	Senador_Canedo	Goiás	16	49	16º43’S,_49º60’W	774	Cerrado	Neotropical_savanna
Roupala_montana	Roupala_montana_disc	Senador_Canedo	Senador_Canedo	Goiás	16	49	16º43’S,_49º60’W	774	Cerrado	Neotropical_savanna
Styrax_ferrugineus	Styrax_ferrugineus_caule	Senador_Canedo	Senador_Canedo	Goiás	16	49	16º43’S,_49º60’W	774	Cerrado	Neotropical_savanna
Acosmium_dasycarpum	Acosmium_dasycarpum	UEG	Anápolis	Goiás	16	48	16º22’S,_48º56’W	1097	Cerrado	Neotropical_savanna
Asteraceae_sp.	Asteraceae_leaf	UEG	Anápolis	Goiás	16	48	16º22’S,_48º56’W	1097	Cerrado	Neotropical_savanna
Byrsonima_pachyphylla	Byrsonima_pachyphylla_cauleglob	UEG	Anápolis	Goiás	16	48	16º22’S,_48º56’W	1097	Cerrado	Neotropical_savanna
Byrsonima_pachyphylla	Byrsonima_pachyphylla_coni	UEG	Anápolis	Goiás	16	48	16º22’S,_48º56’W	1097	Cerrado	Neotropical_savanna
Byrsonima_pachyphylla	Byrsonima_pachyphylla_disc	UEG	Anápolis	Goiás	16	48	16º22’S,_48º56’W	1097	Cerrado	Neotropical_savanna
Byrsonima_pachyphylla	Byrsonima_pachyphylla_virg	UEG	Anápolis	Goiás	16	48	16º22’S,_48º56’W	1097	Cerrado	Neotropical_savanna
Erythroxylum_suberosum	Erythroxylum_suberosum_amorfa	UEG	Anápolis	Goiás	16	48	16º22’S,_48º56’W	1097	Cerrado	Neotropical_savanna
Erythroxylum_tortuosum	Erythroxylum_tortuosum	UEG	Anápolis	Goiás	16	48	16º22’S,_48º56’W	1097	Cerrado	Neotropical_savanna
Neea_theifera	Neea_theifera	UEG	Anápolis	Goiás	16	48	16º22’S,_48º56’W	1097	Cerrado	Neotropical_savanna
Ouratea_hexasperma	Ouratea_hexasperma	UEG	Anápolis	Goiás	16	48	16º22’S,_48º56’W	1097	Cerrado	Neotropical_savanna
Palicourea_rigida	Palicourea_rigida_amor	UEG	Anápolis	Goiás	16	48	16º22’S,_48º56’W	1097	Cerrado	Neotropical_savanna
Palicourea_rigida	Palicourea_rigida_glob	UEG	Anápolis	Goiás	16	48	16º22’S,_48º56’W	1097	Cerrado	Neotropical_savanna
Plant_species	Galling_morphotype	UEG	Anápolis	Goiás	16	48	16º22’S,_48º56’W	1097	Cerrado	Neotropical_savanna
Psidium_myrsinoides	Psidium_myrsinoides_caule	UEG	Anápolis	Goiás	16	48	16º22’S,_48º56’W	1097	Cerrado	Neotropical_savanna
Psidium_myrsinoides	Psidium_myrsinoides_folha	UEG	Anápolis	Goiás	16	48	16º22’S,_48º56’W	1097	Cerrado	Neotropical_savanna
Qualea_grandiflora	Qualea_grandiflora_caule	UEG	Anápolis	Goiás	16	48	16º22’S,_48º56’W	1097	Cerrado	Neotropical_savanna
Qualea_grandiflora	Qualea_grandiflora_folha_disc	UEG	Anápolis	Goiás	16	48	16º22’S,_48º56’W	1097	Cerrado	Neotropical_savanna
Qualea_multiflora	Qualea_multiflora_caule	UEG	Anápolis	Goiás	16	48	16º22’S,_48º56’W	1097	Cerrado	Neotropical_savanna
Qualea_multiflora	Qualea_multiflora_folha_glob_gla	UEG	Anápolis	Goiás	16	48	16º22’S,_48º56’W	1097	Cerrado	Neotropical_savanna
Qualea_parviflora	Qualea_parviflora_disc_glab	UEG	Anápolis	Goiás	16	48	16º22’S,_48º56’W	1097	Cerrado	Neotropical_savanna
Qualea_parviflora	Qualea_parviflora_folha_coni	UEG	Anápolis	Goiás	16	48	16º22’S,_48º56’W	1097	Cerrado	Neotropical_savanna
Qualea_parviflora	Qualea_parviflora_glob_glabra	UEG	Anápolis	Goiás	16	48	16º22’S,_48º56’W	1097	Cerrado	Neotropical_savanna
Schefflera_macrocarpa	Schefflera_macrocarpa_disc	UEG	Anápolis	Goiás	16	48	16º22’S,_48º56’W	1097	Cerrado	Neotropical_savanna
Styrax_ferrugineus	Styrax_ferrugineus_caule	UEG	Anápolis	Goiás	16	48	16º22’S,_48º56’W	1097	Cerrado	Neotropical_savanna
